# Supplementary material
Source: MDPI journal article supplement (https://www.mdpi.com/2073-4352/11/1/77)
Supplement: s1 [file s1]

Supplementary Information for:

INVESTIGATING THE POTENTIAL OF FLEXIBLE AND PRE-ORGANIZED TETRAAMIDE  
LIGANDS TO ENCAPSULATE ANIONS IN ONE DIMENSIONAL COORDINATION  
POLYMERS: SYNTHESIS, SPECTROSCOPIC STUDIES AND CRYSTAL STRUCTURES

Nur Shuhaila Haryani Abd Haris,<sup>1</sup> Nafisah Mansor,<sup>1</sup> Mohd Sukeri Mohd Yusof,<sup>1,2</sup> Christopher J.  
Sumbly<sup>3</sup> and Maisara Abdul Kadir\*<sup>1,2</sup>

<sup>1</sup> *Faculty of Science and Marine Environment, Universiti Malaysia Terengganu, 21030 Kuala Nerus,  
Terengganu, Malaysia*

<sup>2</sup> *Advanced Nano Materials Research Group, Faculty of Science and Marine Environment,  
Universiti Malaysia Terengganu, 21030 Kuala Nerus, Terengganu, Malaysia*

<sup>3</sup> *School of Physical Sciences, Centre for Advanced Nanomaterials, The University of Adelaide,  
Adelaide, South Australia 5005, Australia*

Correspondence: Email: [maisara@umt.edu.my](mailto:maisara@umt.edu.my); Tel: +6096683294

Supplementary Information

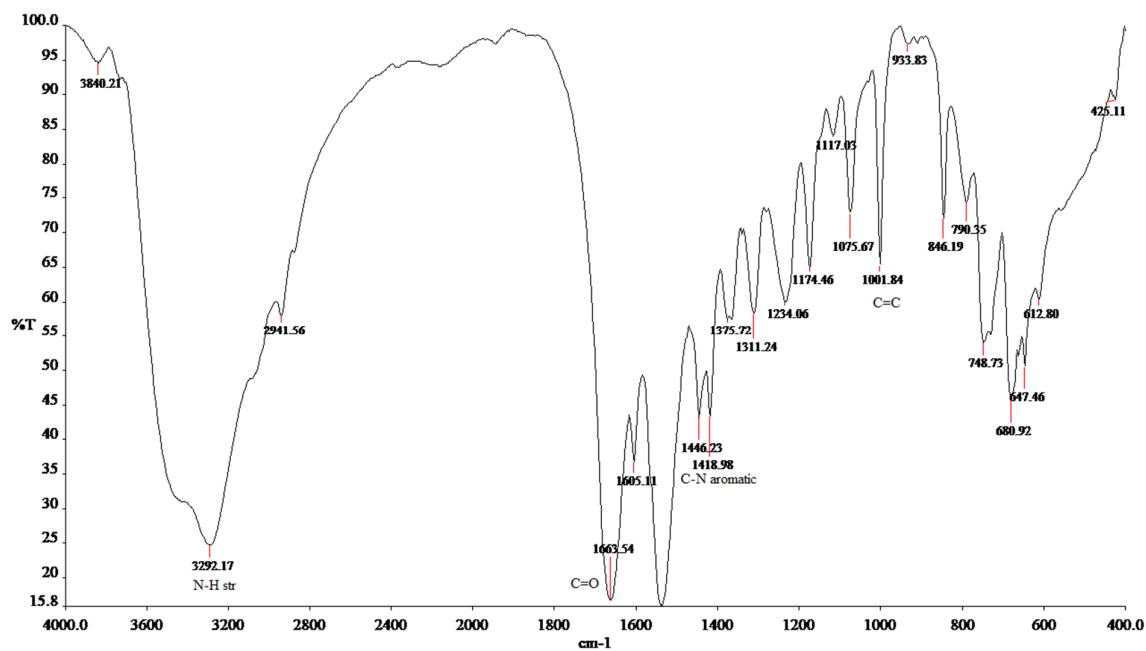

Figure S1. FTIR spectrum of L2

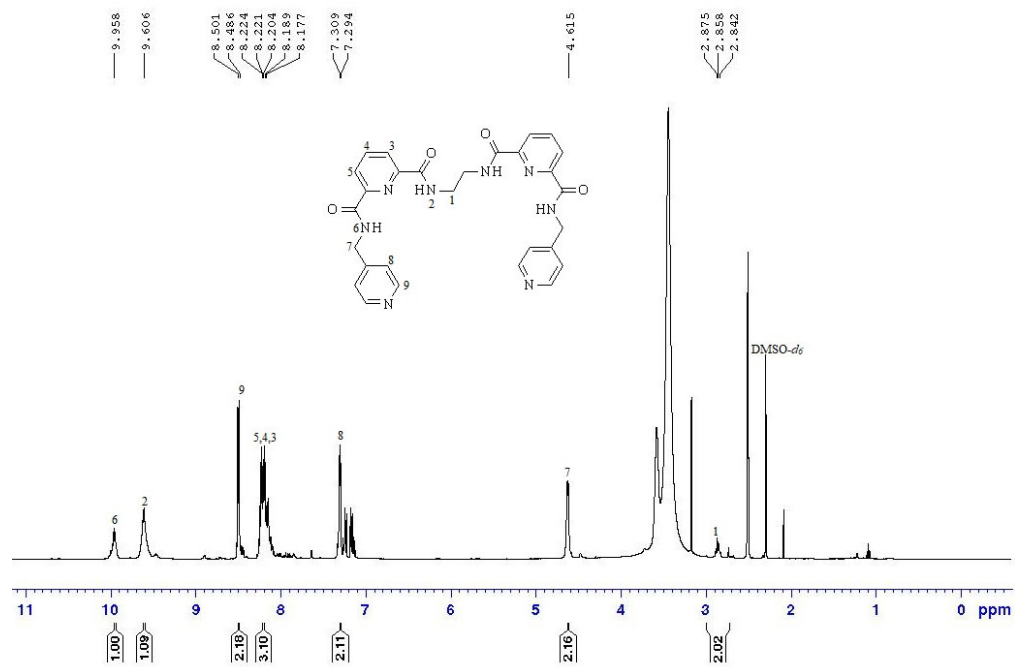

Figure S2.  $^1\text{H}$  NMR spectrum of L2

Supplementary Information

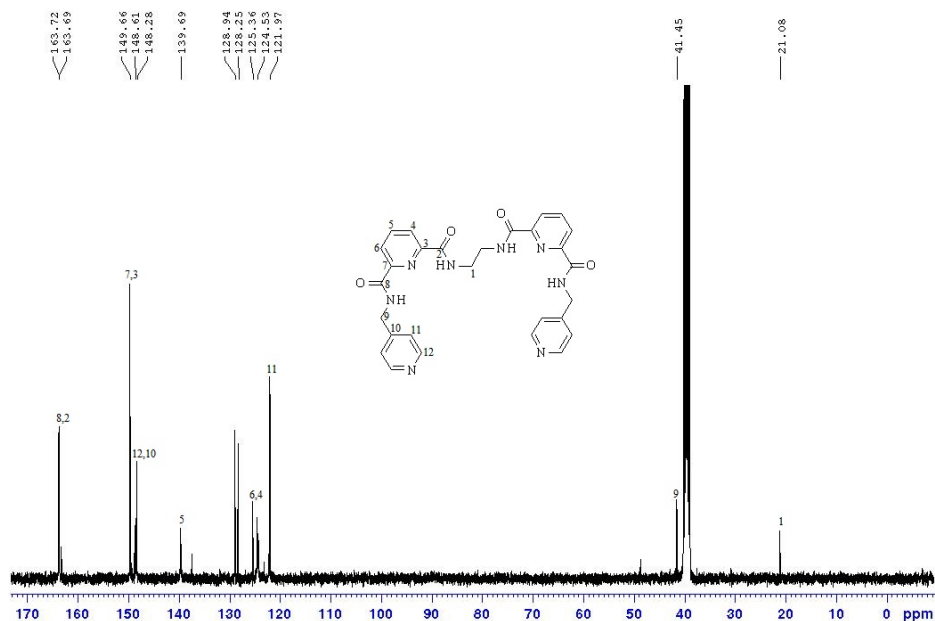

Figure S3.  $^{13}\text{C}$  NMR spectrum of L2

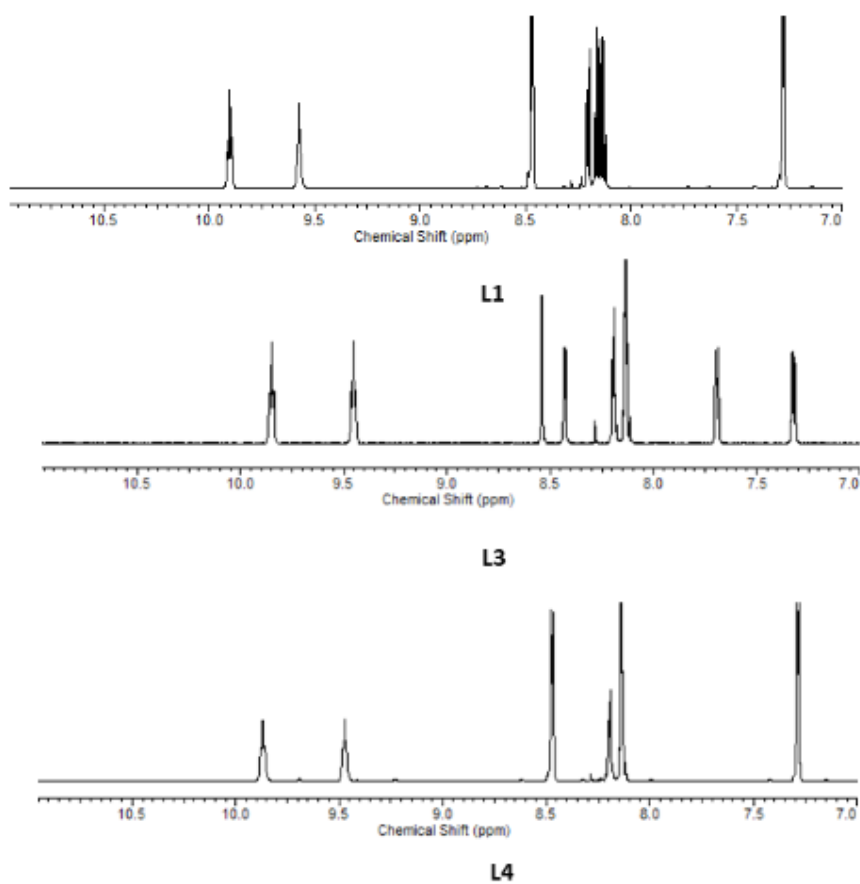

Figure S4. Enlargement of NH and proton pyridine peaks for L1, L3 and L4 in the  $^1\text{H}$  NMR spectra

Supplementary Information

Table S1. The comparison of optimization energy between L2 with different shapes

| Ligand Shape                                                                                                 | Optimization Energy (kJ/mol) |
|--------------------------------------------------------------------------------------------------------------|------------------------------|
| 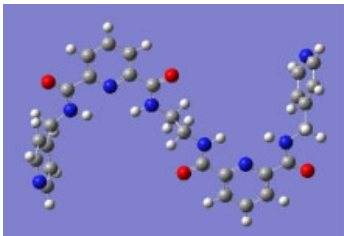<br>S-shaped like structure | -4782816.68                  |
| <br>U-shaped like structure | -4782810.91                  |
